# Supplementary material for: Identifying gene-gene interactions that are highly associated with Body Mass Index using Quantitative Multifactor Dimensionality Reduction (QMDR)
Source: PubMed Central journal article supplement (PMC4678717; doi:10.1186/s13040-015-0074-0), 2015-12-14
Supplement: 13040_2015_74_MOESM1_ESM.pdf [file 13040_2015_74_MOESM1_ESM.pdf]

**Supplementary Table 1.** Information for cohorts providing individual level data

| <b>Cohort No.</b>        | <b>Cohort Name</b> | <b>Geographic Location</b>                                                                        | <b>No. in Sample</b> |
|--------------------------|--------------------|---------------------------------------------------------------------------------------------------|----------------------|
| 1                        | ARIC               | Washington County, MD; Forsyth County, NC; Jackson, MS; and Minneapolis, MN                       | 9217                 |
| 2                        | CARDIA             | Birmingham, AL; Minneapolis, MN; Chicago, IL; and Oakland, CA                                     | 1350                 |
| 4                        | CHS                | Sacramento, CA; Hagerstown, MD; Winston-Salem, NC; and Pittsburgh, PA                             | 3348                 |
| 5                        | FHS                | Framingham, MA                                                                                    | 2484                 |
| 6                        | MESA               | New York, NY; Baltimore, MD; Chicago, IL; Los Angeles, CA; Twin Cities, MN; and Winston-Salem, NC | 2287                 |
| <b>Total Sample Size</b> |                    |                                                                                                   | <b>18686</b>         |
