# Supplementary material for: Identifying gene-gene interactions that are highly associated with Body Mass Index using Quantitative Multifactor Dimensionality Reduction (QMDR)
Source: PubMed Central journal article supplement (PMC4678717; doi:10.1186/s13040-015-0074-0), 2015-12-14
Supplement: 13040_2015_74_MOESM2_ESM.pdf [file 13040_2015_74_MOESM2_ESM.pdf]

**Supplementary Figure 1.** Example of Cartesian product coding. An illustrative example of cartesian product coding used for interactions between SNPs within regression models to test non-additive nature of identified pairwise interactions

|             |               | <b>SNP1</b>   |               |               |
|-------------|---------------|---------------|---------------|---------------|
|             |               | <b>aa (2)</b> | <b>Aa (1)</b> | <b>AA (0)</b> |
| <b>SNP2</b> | <b>tt (2)</b> | 0             | 1             | 2             |
|             | <b>Tt (1)</b> | 3             | 4             | 5             |
|             | <b>TT (0)</b> | 6             | 7             | 8             |
